# Supplementary material
Source: PubMed Central journal article supplement (PMC5754008)
Supplement: NIHMS930673-supplement-supplement_1.pdf [file NIHMS930673-supplement-supplement_1.pdf]

---

**Supplementary Table 1** International classification diagnosis codes for fractures included in the study

---

|                        | <b>ICD9</b>                                                                     | <b>ICD10</b>                                                                                                         |
|------------------------|---------------------------------------------------------------------------------|----------------------------------------------------------------------------------------------------------------------|
| All fractures          | 800-804, 805A-805H, 805W, 805X,<br>806A-806H, 806W, 806X, 807A-807D,<br>808-829 | S02, S12, S22.1-S22.5, S32, S42, S52, S62, S72.0-<br>S72.4, S72.7, S82, S92, T02<br><br>Excluding: S02.5,S12.8,S82.0 |
| Osteoporotic fractures | 812A, 812B, 813, 820, 824                                                       | S42.2, S52, S72.0-S72.2, S82.5, S82.6, S82.8                                                                         |

---
